# Supplementary material
Source: PubMed Central journal article supplement (PMC7607445)
Supplement: NIHMS1639404-supplement-Supplement.pdf [file NIHMS1639404-supplement-Supplement.pdf]

## Supplementary material

Mareike Thies<sup>1,2</sup> · Jan-Nico Zäch<sup>3</sup> · Cong  
Gao<sup>1</sup> · Russell Taylor<sup>1</sup> · Nassir Navab<sup>1</sup> ·  
Andreas Maier<sup>2</sup> · Mathias Unberath<sup>1</sup>

Received: date / Accepted: date

E-mail: unberath@jhu.edu

<sup>1</sup> Laboratory for Computational Sensing + Robotics, Johns Hopkins University, Baltimore, MD

<sup>3</sup> Pattern Recognition Lab, Friedrich-Alexander-Universität Erlangen-Nürnberg

<sup>2</sup> Computer Vision Laboratory, Eidgenössische Technische Hochschule Zürich

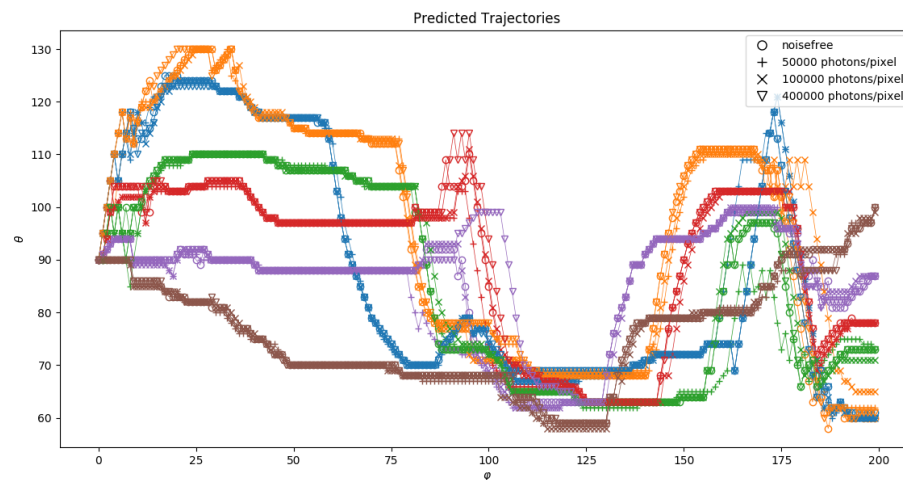

**Fig. 1** Trajectories predicted for different noise levels of the X-ray projections. All acquisitions are plotted in one color for each screw-pair and start at the same out-of-plane angle of  $90^\circ$ . The different noise levels are indicated by different markers: Circles correspond to the noisefree acquisitions, crosses to  $5 \cdot 10^4$  photons per pixel, x to  $1 \cdot 10^5$  photons per pixel and triangles to  $4 \cdot 10^5$  photons per pixel.

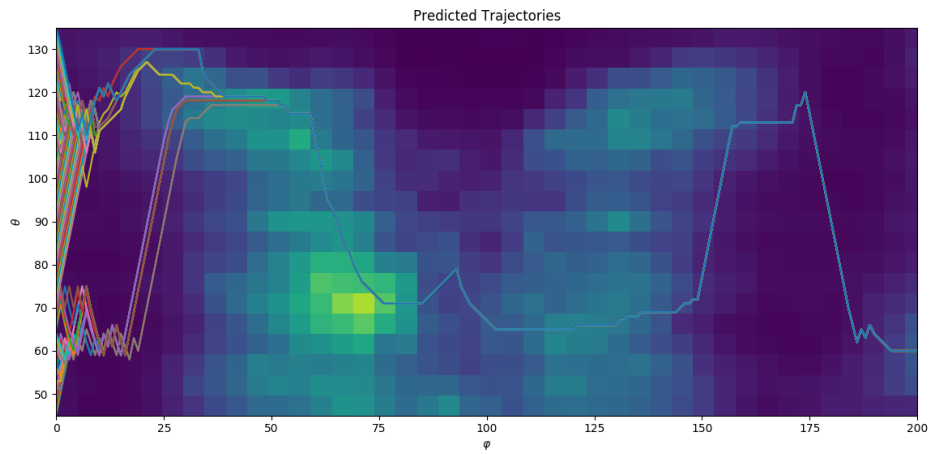

**Fig. 2** Trajectories predicted for all out-of-plane starting angles in the range  $45^\circ \leq \theta \leq 135^\circ$ , with an increment of  $1^\circ$ . The background image corresponds to the groundtruth detectabilities and the plots indicate the chosen trajectories.
